# Supplementary material for: Fission and fusion scenarios for magnetic microswimmer clusters
Source: PubMed Central journal article supplement (PMC5121419; doi:10.1038/ncomms13519), 2016-11-22
Supplement: ncomms13519-s1.pdf [file ncomms13519-s1.pdf]

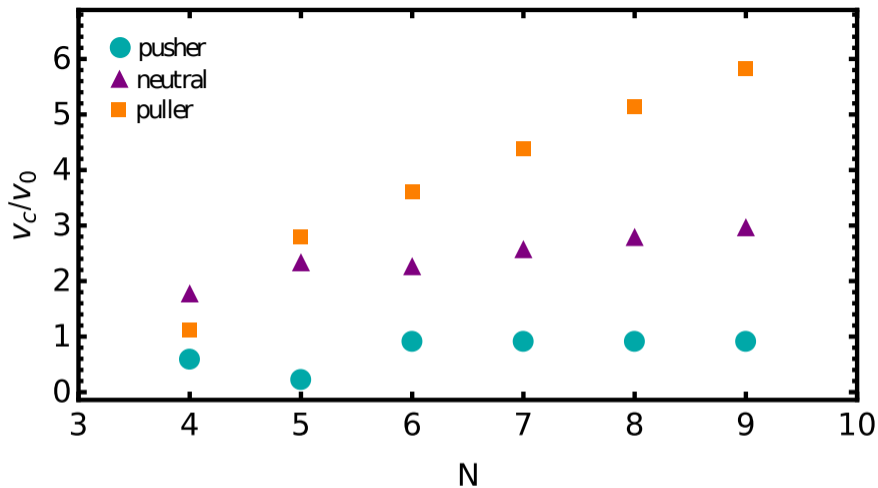

### Supplementary Figure 1| Fission state diagram for rings.

Emerging state diagram spanned by the reduced velocity and number of particles within a ring-like cluster for all three swimmer types.
